# Supplementary material for: Novel dual-site fluorescent probe for monitoring cysteine and sulfite in living cells
Source: Royal Society of Chemistry journal article supplement (doi:10.1039/c8ra01683f), 2018-01-01
Supplement: c8ra01683f1.pdf [file c8ra01683f1.pdf]

## Supporting Information for

### **Novel fluorescent probe with dual-site for monitoring Cys and sulfite in living cells**

Xin Guo<sup>1#</sup>, Lili Xia<sup>2#</sup>, Jinxin Huang<sup>2</sup>, Yiming Wang<sup>1</sup>, Yueqing Gu<sup>\*2</sup>, Peng Wang<sup>\*2</sup>

<sup>1</sup>*Jiangsu Provincial Key Laboratory for Interventional Medical Devices, Huaiyin*

*Institute of Technology, Huaian, Jiangsu Province, 223003, China*

<sup>2</sup>*Department of Biomedical Engineering, School of Engineering, China*

*Pharmaceutical University, Nanjing 210009, China*

Corresponding email: [wangpeng159seu@hotmail.com](mailto:wangpeng159seu@hotmail.com)

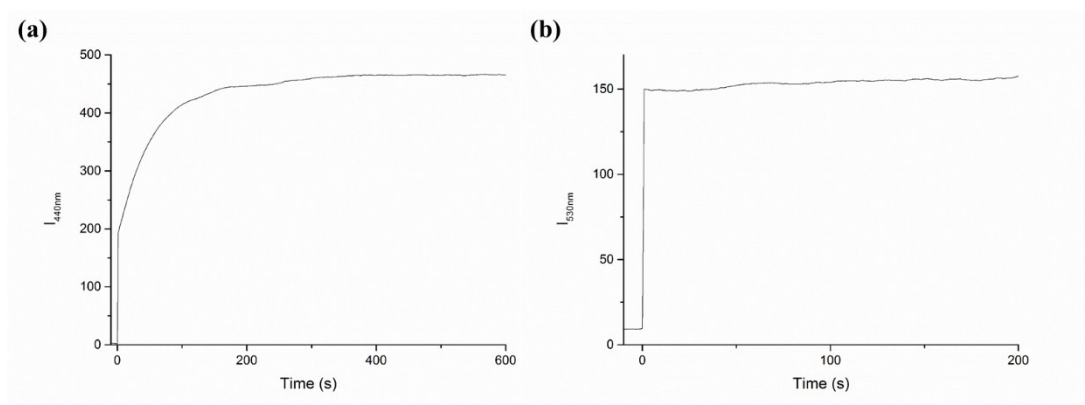

**Figure S1.** Reaction time profile of probe LC-1 (20  $\mu$ M) in the presence of (a) Cys (400  $\mu$ M) or (b)  $\text{SO}_3^{2-}$  (400  $\mu$ M) in aqueous solution (pH 7.4, 20 mM PBS buffer solution containing 50% DMSO).

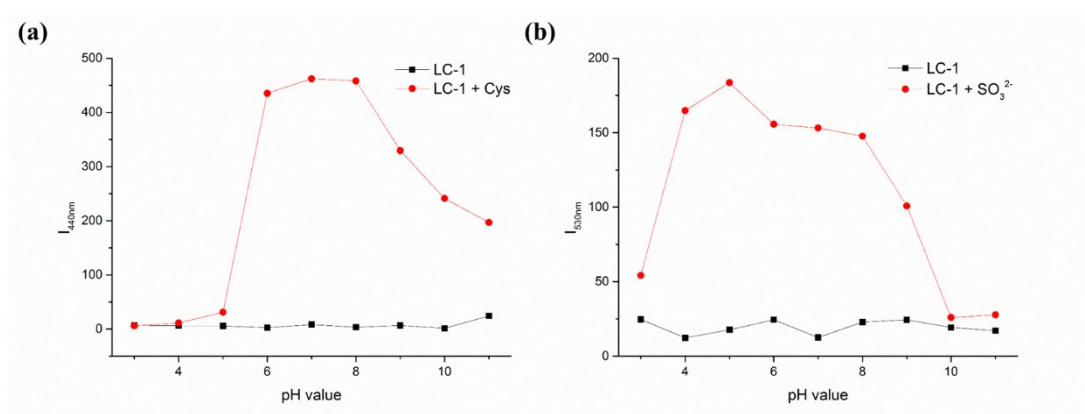

**Figure S2.** pH effect in fluorescence response of LC-1 to Cys and  $\text{SO}_3^{2-}$ .

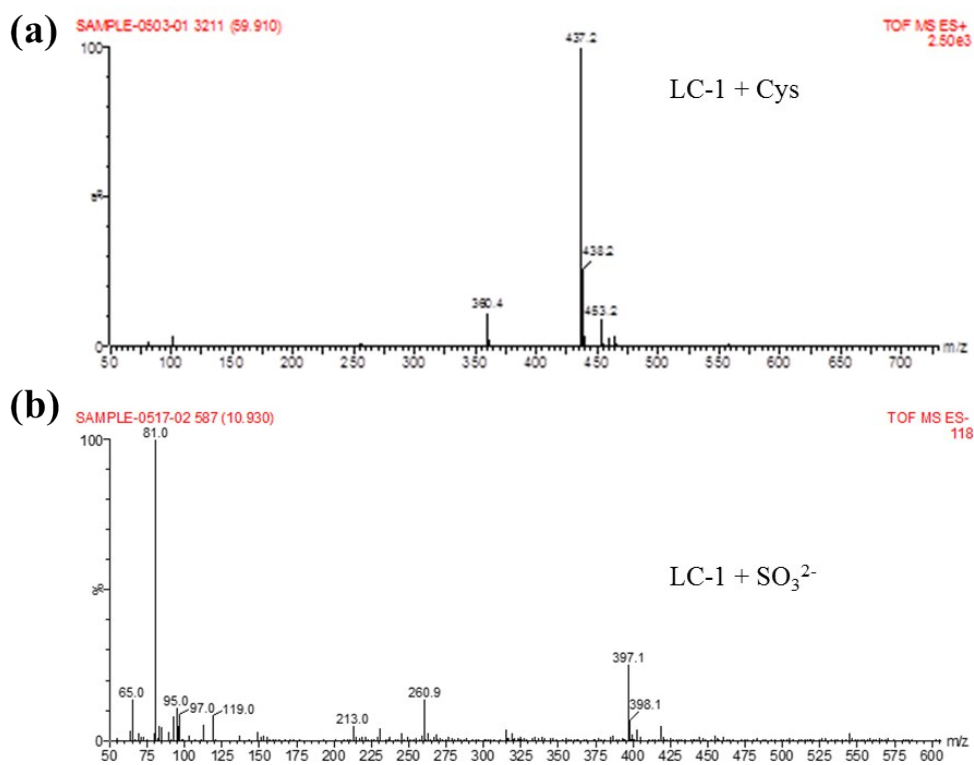

**Figure S3.** MS spectra of Cys-LC-1 system (a) and SO<sub>3</sub><sup>2-</sup>-LC-1 system (b)

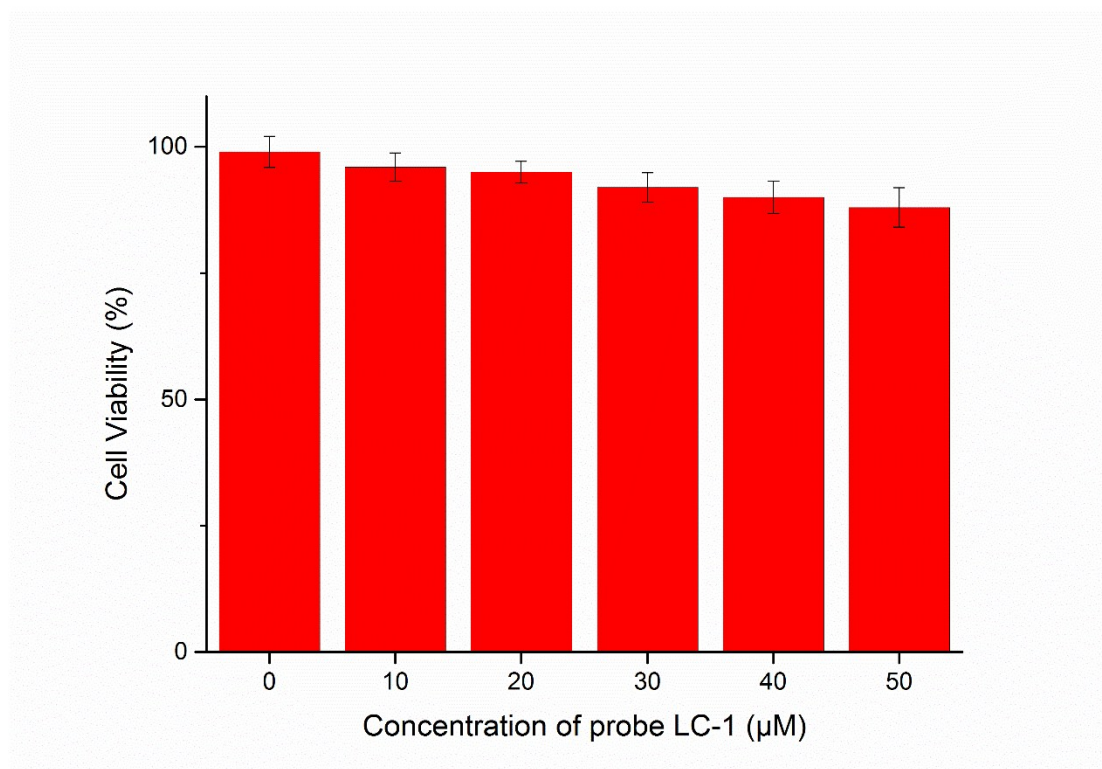

**Figure S4.** Cell viability of MCF-7 treated with probe LC-1.

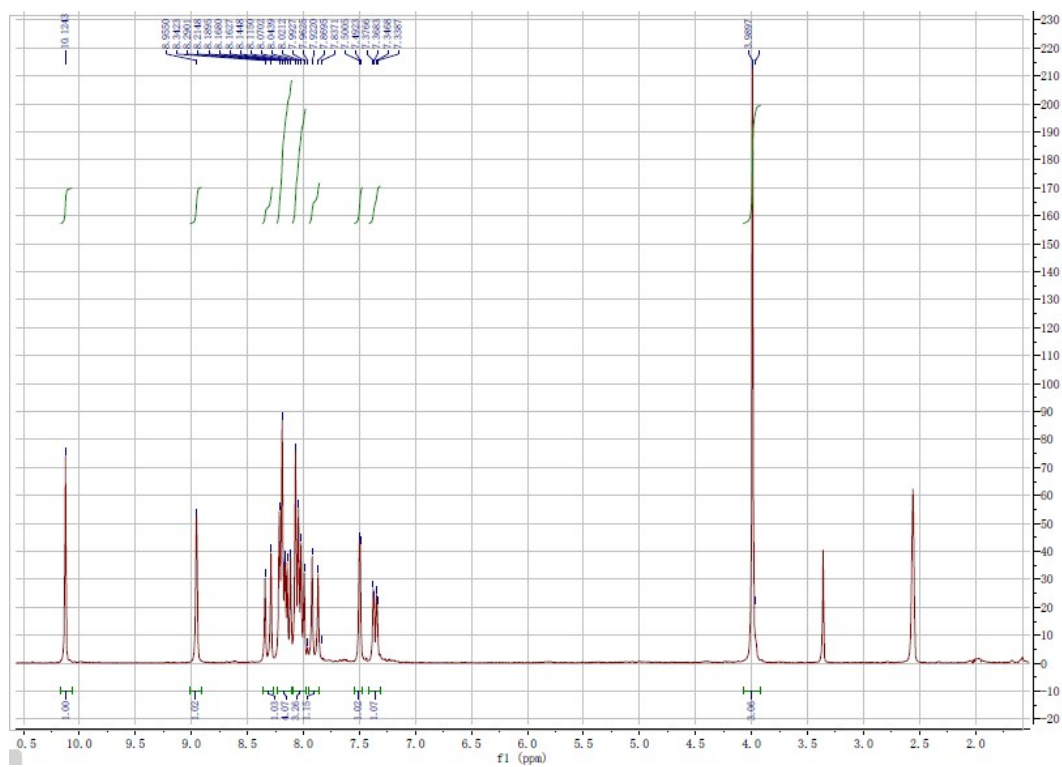

Figure S5.  $^1\text{H}$  NMR spectrum of probe LC-1.

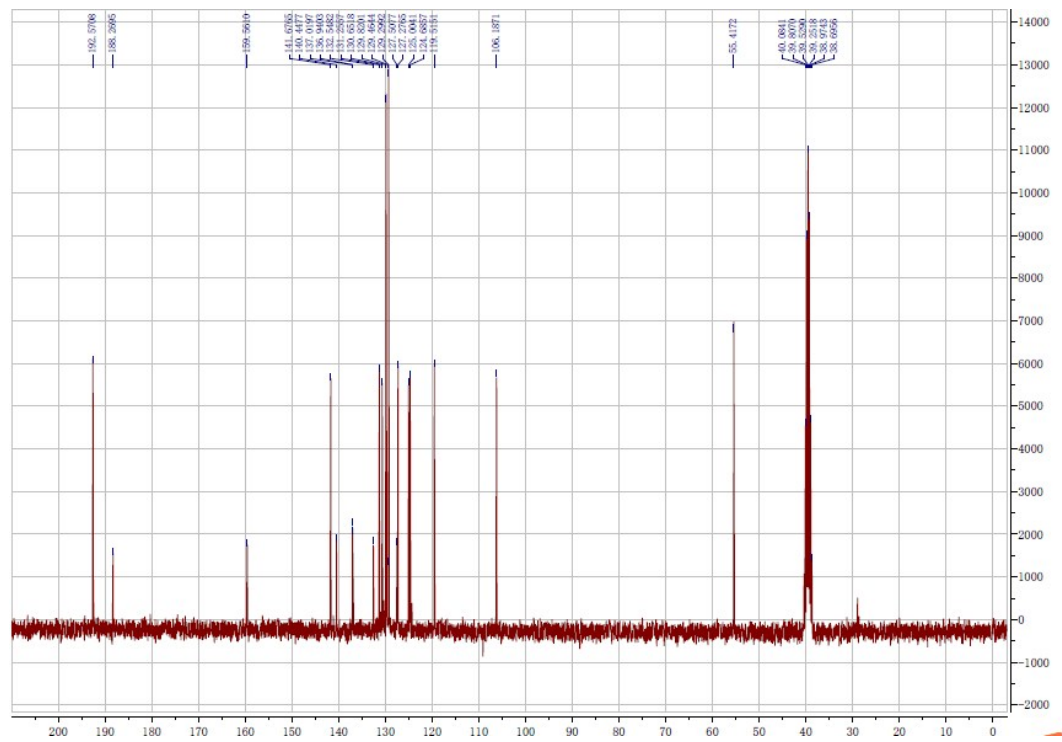

Figure S6.  $^{13}\text{C}$  NMR spectrum of probe LC-1.

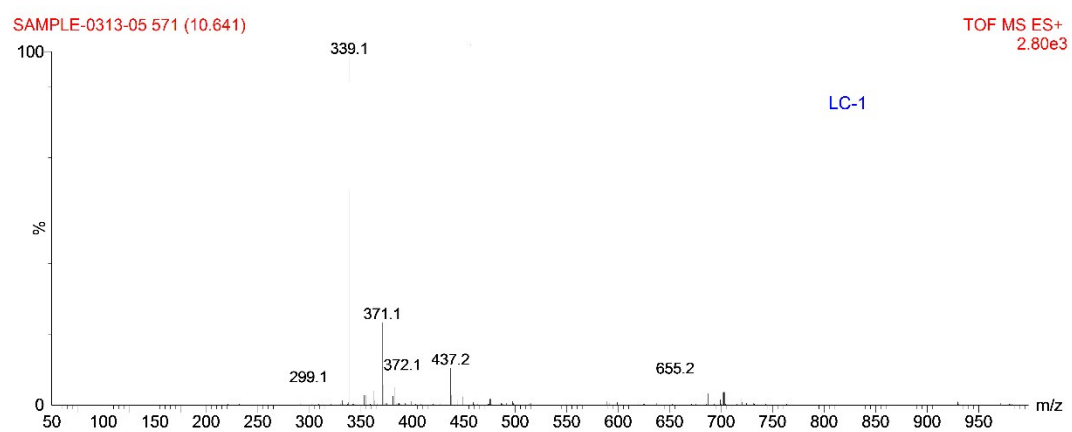

**Figure S7.** MS spectrum of probe LC-1
